# Supplementary material for: Enhanced cycling stability of TiO2-coated V2O5 nanorods through a surface sol–gel process for lithium ion battery applications
Source: Royal Society of Chemistry journal article supplement (doi:10.1039/c3ta14364c), 2014-01-01
Supplement: c3ta14364c.pdf [file c3ta14364c.pdf]

Supplementary Information

## Enhanced cyclic stability of TiO<sub>2</sub>-coated V<sub>2</sub>O<sub>5</sub> nanorods through a surface sol-gel process for lithium ion battery applications

5 Shuang Tian,<sup>a</sup> An Xing,<sup>a</sup> Huang Tang,<sup>a</sup> Zhihao Bao<sup>\*a</sup> and Guangming Wu<sup>\*a</sup>

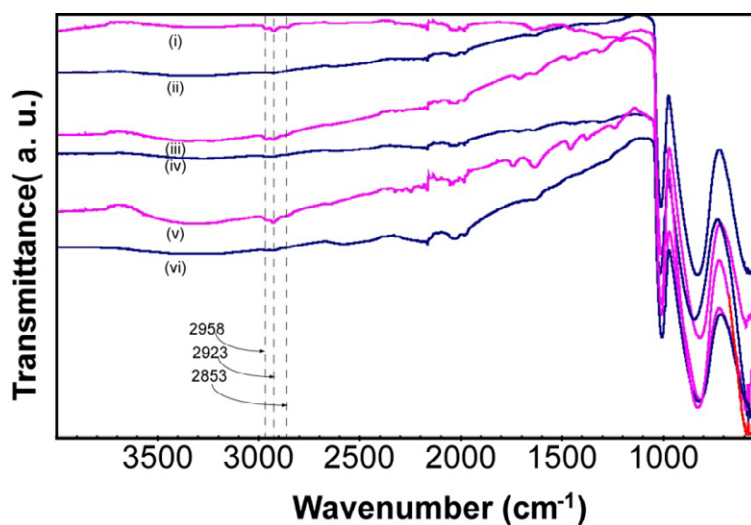

Figure S1. FTIR spectra of V<sub>2</sub>O<sub>5</sub> nanorods after (i) first chemisorption of Ti(O-nBu)<sub>4</sub>, (ii) first hydrolysis in water, (iii) second chemisorption of Ti(O-nBu)<sub>4</sub>, (iv) second hydrolysis in water, (v) third chemisorption of Ti(O-nBu)<sub>4</sub>, and (vi) third hydrolysis in water.

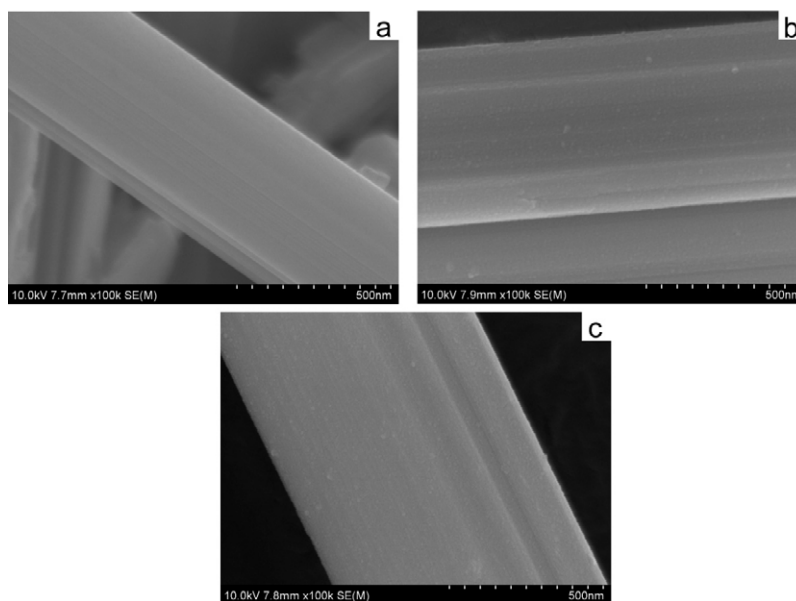

Figure S2. High-resolution SEM images of V<sub>2</sub>O<sub>5</sub> nanorods before (a), after 5 (b) and 10 (c) SSP deposition cycles, respectively

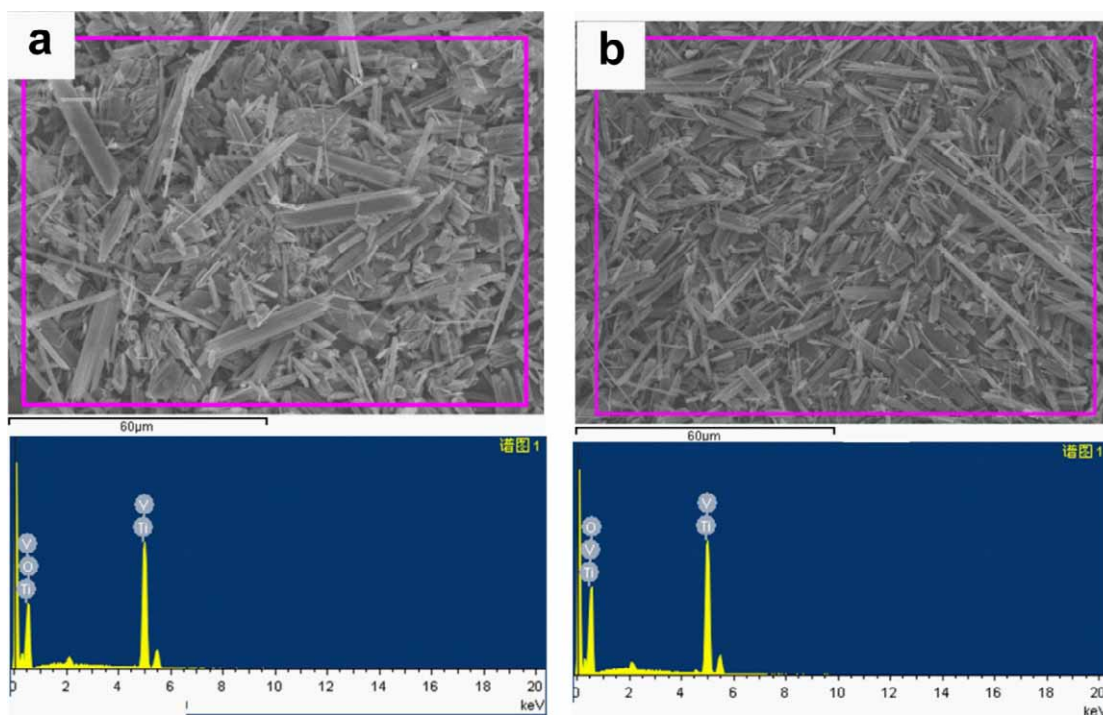

Figure S3 . EDX analyses of  $V_2O_5$  nanorods after 5 (a) and 10 (b) SSP deposition cycles, respectively.

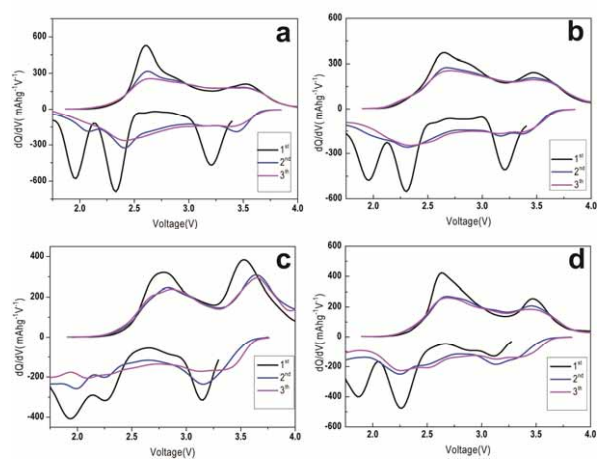

Figure S4.  $dQ/dV$  versus voltage profiles of the electrodes based on  $V_2O_5$  powder (a) , bare nanorods (b), nanorods after 5 SSP deposition cycles (c) , and nanorods after 10 SSP deposition cycles (d), respectively.

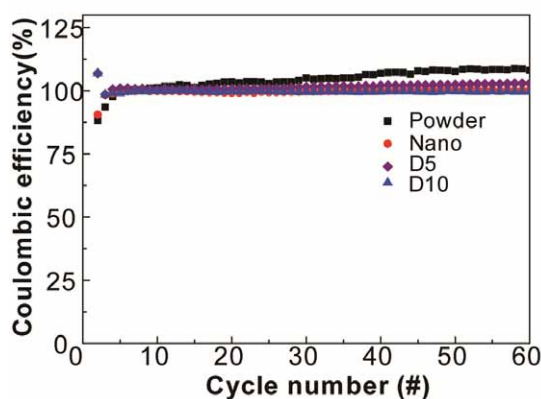

Figure S5. Plots of the Coulombic efficiencies of the electrodes versus the cycle number.

5

Table S1. Summary of the electrochemical performance of the modified  $V_2O_5$  electrodes in the recent works.

| Reference No. | Materials                                                               | Specific current          | Capacity after n cycles (mAh g <sup>-1</sup> ) |
|---------------|-------------------------------------------------------------------------|---------------------------|------------------------------------------------|
| This work     | TiO <sub>2</sub> -coated V <sub>2</sub> O <sub>5</sub>                  | 30 mA g <sup>-1</sup>     | 251 (after 60 cycles)                          |
| 1             | spherically shaped dense V <sub>2</sub> O <sub>5</sub>                  | 29.4 mA g <sup>-1</sup>   | 263 (after 20 cycles)                          |
| 2             | ZrO <sub>2</sub> -Doped V <sub>2</sub> O <sub>5</sub> Amorphous Powders | 294 mA g <sup>-1</sup>    | 222 (after 50 cycles)                          |
| 3             | V <sub>2</sub> O <sub>5</sub> /polypyrrole                              | 0.1C                      | 225.4(after 50 cycles)                         |
| 4             | Cu-doped V <sub>2</sub> O <sub>5</sub>                                  | 80 mA g <sup>-1</sup>     | 220 (after 45 cycles)                          |
| 5             | Al-Intercalated V <sub>2</sub> O <sub>5</sub>                           | 35 mA g <sup>-1</sup>     | 231(after 50 cycles)                           |
| 6             | Three-Dimensional Vanadium Oxide                                        | 300 mA g <sup>-1</sup>    | 219(after 50 cycles)                           |
| 7             | V <sub>2</sub> O <sub>5</sub> microspheres                              | 10C                       | 130(after 100 cycles)                          |
| 8             | yolk-shell V <sub>2</sub> O <sub>5</sub> powders                        | 1000 mA g <sup>-1</sup>   | 201(after 100 cycles)                          |
| 9             | V <sub>2</sub> O <sub>5</sub> - polypyrrole                             | 40 mA g <sup>-1</sup>     | 187(after 100 cycles)                          |
| 10            | V <sub>2</sub> O <sub>5</sub> films                                     | 0.025 mA cm <sup>-2</sup> | 200(after 40 cycles)                           |

Reference:

- 1, Ko, Y. N.; Kim, J. H.; Choi, S. H.; Kang, Y. C. *J. Power Sources* 2012, 211, 84
- 2, Y. N. Ko, S. H. Choi, Y. C. Kang and S. B. Park, *ACS Appl. Mater. Interfaces*, 2013, 5, 3234
- 3, X.Z. Ren, C. Shi, P. Zhang, Y.K. Jiang, J.H. Liu, Q.L. Zhang, *Mater. Sci. and Eng. B*, 177 (2012), 929
- 4, D. Zhu, H. Liu, L. Lv, Y.D. Yao, W.Z. Yang, *Scripta Materialia*, 59 (2008), p. 642
- 5, Cheah, Y. L.; Aravindan, V.; Madhavi, S. *ACS Appl. Mater. Interfaces* 2012, 4 ( 6) 3270–3277
- 6, A. Q. Pan, H. B. Wu, L. Yu, T. Zhu and X. W. Lou, *ACS Appl. Mater. Interfaces*, 2012, 4, 3874
- 7, Zhang, C.; Chen, Z.; Guo, Z.; Lou, X. W. *Energy Environ. Sci.* 2013, 6, 974–978.
- 8, Ko, You Na; Kang, Yun Chan; Park, Seung Bin, *Nanoscale*. 2013,5, 8899-8903
- 9, L. Noerochim, J. Z. Wang, D. Wexler, Md. M. Rahman, J. Chen and H. K. Liu, *J. Mater. Chem.*, 2012, 22, 11159;
10. V. Varadaraajan, B. C. Satishkumar, J. Nanda, and P. Mohanty, *J. Power Sources*, 196, 10704 (2011)

20

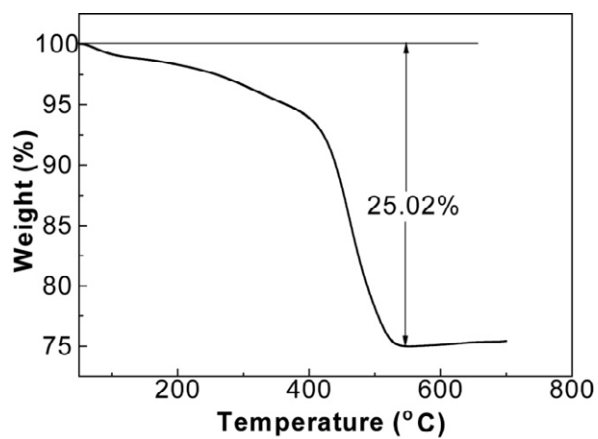

Figure S6. Thermogravimetric analysis of the  $V_2O_5(D5)$ /graphene composite thin film in air.
